# Supplementary material for: Impact of Indocyanine Green in Laparoscopic Cholecystectomy: Enhancing Safety, Reducing Conversion Rates and Optimizing Operative Time through Predictive Scoring Systems
Source: Research Square preprint supplement (doi:10.21203/rs.3.rs-6900172/v1), 2025-07-28
Supplement: Supplementary file 1 [file 04920c5def270b1647b361c3.docx]

| **Table 4. Relationship between CLOC, G10, CAAD Risk Scores, Surgical Time Score (CholeS Study Group)**  **and Surgical Time; n = 44** | | | | | | | |
| --- | --- | --- | --- | --- | --- | --- | --- |
| **Surgical Time** | | | | | | | |
|  | | **<45 min, n (%)** |  | **45-90 min, n (%)** |  | **>90 min, n (%)** | *p* |
| **CLOC, n (%)**  **≦6, 17 (38.6%)**  **>6, 27 (61.4%)** | 8 (47%)  10 (37%) | |  | 7 (41%)  16 (59%) |  | 2 (12%)  1 (4%) | *0.38* |
| **G10, n (%)**  **<3, 25 (56.8%)**  **≥3, 19 (43.2%)**  **<5, 36 (81.8%)**  **≥5, 8 (18.2%)** | 14 (56%)  4 (21%)  17 (47%)  1 (12,5%) | |  | 11 (44%)  12 (63%)    18 (50%)  5 (62,5%) |  | 0 (0%)  3 (16%)  1 (2,8%)  2 (25%) | *0.01*  *0.03* |
| **CAAD, n (%)**  **≦5, 16 (36.4%)**  **>5 28 (63.6%)** | 7 (44%)  11 (39%) | |  | 8 (50%)  15 (53%) |  | 1 (6%)  2 (7%) | *0.95* |
| **Surgical Time Score (CholeS Study Group), n (%)**  **Low score, 9 (20.4%)**  **Intermediate**  **score, 32 (72.7%)**  **High score, 3 (6.8%)** | 6 (67%)  12 (37.5%)  0 (0%) | |  | 3 (33%)  17 (53%)  3 (100%) |  | 0 (0%)  3 (9.4%)  0 (0%) | *0.21* |
| **Nassar Score 2019,**  **n (%)**  **Low score, 11 (25%)**  **Intermediate**  **score, 13 (29.5%)**  **High score, 20 (45.5%)** | 7 (63.6%)  2 (15.4%)  9 (45%) | |  | 4 (36.4%)  9 (69.2%)  10 (50%) |  | 0 (0%)  2 (15.4%)  1 (5%) | *0.13* |

*McNemar test was used for qualitative variables. p-value < 0.05 is considered statistically significant*
