# Supplementary material for: Impact of Indocyanine Green in Laparoscopic Cholecystectomy: Enhancing Safety, Reducing Conversion Rates and Optimizing Operative Time through Predictive Scoring Systems
Source: Research Square preprint supplement (doi:10.21203/rs.3.rs-6900172/v1), 2025-07-28
Supplement: Supplementary file 2 [file 4abcdd5b9de3f9cd57e766ce.docx]

| **Table 3. Clinical factors that may affect the ability of ICG NIRF-C to delineate biliary structures before and after dissection of Calot’s triangle, n = 44** | | | | | | | | | | | | |
| --- | --- | --- | --- | --- | --- | --- | --- | --- | --- | --- | --- | --- |
| Before dissection of Calot’s triangle | | | | | | | After dissection of Calot’s triangle | | | | | |
|  | **CD, n (%)** | *p* | **CBD, n (%)** | *p* | **CDBDJ, n (%)** | *p* | **CD, n (%)** | *p* | **CBD, n (%)** | *p* | **CDBDJ, n (%)** | *p* |
| **BMI, n (%)**  **<30, 32 (70%)**  **≥30, 12 (30%)** | 0 (0%)  0 (0%) | - | 12 (37.5%)  1 (8.3%) | *0.06* | 0 (0%)  0 (0%) | - | 21 (65%)  10 (83%) | *0.25* | 32 (100%)  12 (100%) | - | 27 (84%)  10 (83%) | *0.93* |
| **Nassar Grade, n (%)**  **<3, 33 (75%)**  **≥3, 11 (25%)** | 0 (0%)  0 (0%) | - | 13 (39%)  0 (0%) | *0.013* | 0 (0%)  0 (0%) | - | 23 (70%)  8 (73%) | *0.85* | 33 (100%)  11 (100%) | - | 29 (88%)  8 (73%) | *0.23* |
| **Gallbladder inflammation, n (%)**  **No inflammation, 20 (45%)**  **Inflammation, 24 (55%)** | 0 (0%)  0 (0%) | - | 13 (65%)  0 (0%) | *0.001* | 0 (0%)  0 (0%) | - | 14 (70%)  17 (71%) | *0.95* | 20 (100%)  24 (100%) | - | 20 (100%)  17 (71%) | *0.008* |

*McNemar test was used for qualitative variables. p-value < 0.05 is considered statistically significant*
