# Supplementary material for: Impact of Indocyanine Green in Laparoscopic Cholecystectomy: Enhancing Safety, Reducing Conversion Rates and Optimizing Operative Time through Predictive Scoring Systems
Source: Research Square preprint supplement (doi:10.21203/rs.3.rs-6900172/v1), 2025-07-28
Supplement: Supplementary file 3 [file 4ba172ff27e424f6c5f2c794.docx]

| **Table 5. Relationship between the ability of fluorescence cholangiography to delineate the bile duct anatomy before and after dissection of Calot’s triangle and CLOC, G10, CAAD Risk Scores and Surgical Time Score (CholeS Study Group) n = 44** | | | | | | | | | | | | |
| --- | --- | --- | --- | --- | --- | --- | --- | --- | --- | --- | --- | --- |
| Before dissection of Calot’s triangle | | | | | | | After dissection of Calot’s triangle | | | | | |
|  | **CD, n (%)** | *p* | **CBD, n (%)** | *p* | **CDBDJ, n (%)** | *p* | **CD, n (%)** | *p* | **CBD, n (%)** | *p* | **CDBDJ, n (%)** | *p* |
| **CLOC, n (%)**  **≦6, 17 (38.6%)**  **>6, 27 (61.4%)** | 0 (0%)  0 (0%) | - | 6 (35%)  7 (26%) | *0.5* | 0 (0%)  0 (0%) | - | 11 (65%)  20 (74%) | *0.5* | 17 (100%)  27 (100%) | - | 15 (88%)  22 (81.5%) | *0.5* |
| **G10, n (%)**  **<3, 25 (56.8%)**  **≥3, 19 (43.2%)**  **<5, 36 (81.8%)**  **≥5, 8 (18.2%)** | 0 (0%)  0 (0%)  0 (0%)  0 (0%) | -  - | 12 (48%)  1 (5.3%)    13 (36%)  0 (0%) | *0.002*  *0.043* | 0 (0%)  0 (0%)  0 (0%)  0 (0%) | -  - | 18 (72%)  13 (68%)  25 (69%)  6 (75%) | *0.8*  *0.75* | 25 (100%)  19 (100%)  36 (100%)  8 (100%) | -  - | 23 (92%)  14 (74%)  31 (86%)  6 (75%) | *0.1*  *0.43* |
| **CAAD, n (%)**  **≦5, 16 (36.4%)**  **>5 28 (63.6%)** | 0 (0%)  0 (0%) | - | 6 (37.5%)  7 (25%) | *0.38* | 0 (0%)  0 (0%) | - | 10 (62.5%)  21 (75%) | *0.38* | 16 (100%)  28 (100%) | - | 13 (81%)  24 (86%) | *0.7* |
| **Surgical Time Score (CholeS Study Group), n (%)**  **Low score, 9 (20.4%)**  **Intermediate**  **score, 32 (72.7%)**  **High score, 3 (6.8%)** | 0 (0%)  0 (0%)  0 (0%) | - | 3 (33%)  10 (31%)  0 (0%) | *0.5* | 0 (0%)  0 (0%)  0 (0%) | - | 7 (78%)  22 (69%)  2 (67%) | *0.86* | 9 (100%)  32 (100%)  3 (100%) | - | 9 (100%)  26 (81.3%)  2 (67%) | *0.27* |
| **Nassar Score 2019, n (%)**  **Low score, 11 (25%)**  **Intermediate**  **score, 13 (29.5%)**  **High score, 20 (45.5%)** | 0 (0%)  0 (0%)  0 (0%) | - | 7 (63.6%)  1 (7.7%)  5 (25%) | *0.009* | 0 (0%)  0 (0%)  0 (0%) | - | 7 (63.6%)  11 (84.6%)  13 (65%) | *0.41* | 11 (100%)  13 (100%)  20 (100%) | - | 11 (100%)  11 (84.6%)  15 (75%) | *0.19* |

*McNemar test was used for qualitative variables. p-value < 0.05 is considered statistically significant*
