# Supplementary material for: Impact of Indocyanine Green in Laparoscopic Cholecystectomy: Enhancing Safety, Reducing Conversion Rates and Optimizing Operative Time through Predictive Scoring Systems
Source: Research Square preprint supplement (doi:10.21203/rs.3.rs-6900172/v1), 2025-07-28
Supplement: Supplementary file 4 [file 654e9bd85368e716ffc17f3f.docx]

| **Table 2. Identification of biliary structures with NIR light** | | | |
| --- | --- | --- | --- |
|  | Before dissection of  Calot’s triangle (n = 44) | After dissection of  Calot’s triangle (n = 44) | *p* |
| CD, n (%) | 0 (0%) | 31 (71%) | *0.001* |
| CBD, n (%) | 13 (29%) | 44 (100%) | *0.001* |
| CDBDJ, n (%) | 0 (0%) | 37 (84%) | *0.001* |

*McNemar test was used for qualitative variables. p-value < 0.05 is considered statistically significant.*

*NIR, near infrared; CD, cystic duct; CBD, common bile duct; CDBDJ, cystic duct-bile duct junction.*
