# Supplementary material for: Impact of Indocyanine Green in Laparoscopic Cholecystectomy: Enhancing Safety, Reducing Conversion Rates and Optimizing Operative Time through Predictive Scoring Systems
Source: Research Square preprint supplement (doi:10.21203/rs.3.rs-6900172/v1), 2025-07-28
Supplement: Supplementary file 5 [file c901c9d3a6919f22df56e7f5.docx]

| **Table 1. Patient characteristics, intraoperative data and postoperative outcomes** | |
| --- | --- |
| Total number of patients | 44 |
| Age (years) a | 57 ± 15 |
| Gender | 16 F (36%); 28 M (64%) |
| **ASA score**  ASA I  ASA II  ASA III | 9 (20%)  24 (55%)  11 (25%) |
| BMI (kg/m2) a | 28 ± 5 |
| - BMI < 30 | 31 (70%) |
| - BMI ≥ 30 | 13 (30%) |
| Smoker | 17 (39%) |
| Diabetes mellitus | 7 (16%) |
| Arterial hypertension | 23 (52%) |
| Hypercholesterolaemia | 18 (41%) |
| Hypertriglyceridaemia | 6 (14%) |
| **Surgical indication** | |
| Symptomatic cholelithiasis | 13 (30%) |
| Choledocholithiasis | 7 (16%) |
| Cholecystitis | 12 (27%) |
| Lithiasic pancreatitis | 12 (27%) |
| **Gallbladder inflammation** | |
| No inflammation | 20 (45%) |
| Acute inflammation | 2 (5%) |
| Chronic inflammation | 22 (50%) |
| **Nassar Grade** | |
| Grade 1 | 20 (45%) |
| Grade 2 | 13 (29%) |
| Grade 3 | 8 (18%) |
| Grade 4 | 3 (7%) |
| **Hepatic hyperluminescence effect** | 0 (0%) |
| **Operation time (min)** b | 45 ± 15 |
| **CLOC score > 6** 27 (61,4%) | |
| **G10 score ≥ 3**  **G10 score ≥ 5** | 19 (43,2%)  8 (18,2%) |
| **CAAD score > 5** | 28 (63,6%) |
| **Surgical Time Score**  **(CholeS Study Group)**  **Low score**  **Intermediate**  **score**  **High score** | 9 (20.4%)  32 (72.7%)  3 (6.8%) |
| **Nassar Score 2019**  **Low score**  **Intermediate**  **score**  **High score** | 11 (25%)  13 (29.5%)  20 (45.5%) |
| **Perioperative complications** | 0 (0%) |
| **Mean hospital stay (hours) b** | 28 ± 4 |
| **Readmissions** | 0 (0%) |

*Categorical values are presented as percentages. a Normally distributed variables are expressed as mean and standard deviation (SD). b Non normally distributed variables are expressed as median and interquartile range.*

*ASA, American Society of Anaesthesiologists; BMI, body mass index; VAS, visual analogue scale.*
